1 Research Article

2

3 **Inactivation of SARS Coronavirus 2 and COVID-19 patient samples**  
4 **for contemporary immunology and metabolomics studies**

5

6 Running title: Inactivation of COVID-19 samples

7

8 **Devon J. Eddins<sup>a,b,c</sup>, Leda Bassit<sup>d,†</sup>, Joshua D. Chandler<sup>b,e,†</sup>, Natalie S. Haddad<sup>a,f</sup>, Katie L.**  
9 **Musall<sup>d</sup>, Junkai Yang<sup>a</sup>, Astrid Kusters<sup>a</sup>, Brian S. Dobosh<sup>b,e</sup>, Mindy R. Hernández<sup>f</sup>, Richard**  
10 **P. Ramonell<sup>f,g</sup>, Rabindra M. Tirouvanziam<sup>b,e</sup>, F. Eun-Hyung Lee<sup>a,c,f</sup>, Keivan Zandi<sup>d</sup>, Raymond**  
11 **F. Schinazi<sup>d</sup>, Eliver E.B. Ghosn<sup>a,b,c\*</sup>**

12

13 <sup>a</sup> Lowance Center for Human Immunology, Department of Medicine, Division of Immunology and  
14 Rheumatology, Emory University School of Medicine, Atlanta, GA 30322, USA

15 <sup>b</sup> Department of Pediatrics, Emory University School of Medicine, Atlanta, GA 30322, USA

16 <sup>c</sup> Emory Vaccine Center, Yerkes National Primate Research Center, Emory University School of  
17 Medicine, Atlanta, GA 30322, USA

18 <sup>d</sup> Center for AIDS Research, Laboratory of Biochemical Pharmacology, Department of Pediatrics,  
19 Emory University School of Medicine and Children's Healthcare of Atlanta, Atlanta, GA 30322,  
20 USA

21 <sup>e</sup> Center for CF and Airways Disease Research, Children's Healthcare of Atlanta and Department  
22 of Pediatrics, Emory University School of Medicine, Atlanta, GA, 30322, USA

23 <sup>f</sup> Department of Medicine, Division of Pulmonary, Allergy, Critical Care & Sleep Medicine, Emory  
24 University School of Medicine, Atlanta, GA 30322, USA

25 <sup>g</sup> Current address: Department of Medicine, Division of Pulmonary, Allergy and Critical Care  
26 Medicine, University of Pittsburgh School of Medicine, Pittsburgh, PA 15213, USA

27

28 <sup>†</sup> These authors contributed equally: Leda Bassit and Joshua D. Chandler

29

30 **\*Corresponding Author Contact Info**

31 Eliver E.B. Ghosn (ORCID: 0000-0001-7258-906X): Lowance Center for Human Immunology,  
32 Health Sciences Research Building, 1760 Haygood Dr. NE, E240, Atlanta, GA 30322, USA; tel:  
33 +1-404-712-3211; email: [eliver.ghosn@emory.edu](mailto:eliver.ghosn@emory.edu)

34

35 **Summary**

36

37 In late 2019, severe acute respiratory syndrome coronavirus 2 (SARS-CoV-2) emerged from  
38 Wuhan, China spurring the Coronavirus Disease-19 (COVID-19) pandemic that has resulted in  
39 over 219 million confirmed cases and nearly 4.6 million deaths worldwide. Intensive research  
40 efforts ensued to constrain SARS-CoV-2 and reduce COVID-19 disease burden. Due to the  
41 severity of this disease, the US Centers for Disease Control and Prevention (CDC) and World  
42 Health Organization (WHO) recommend that manipulation of active viral cultures of SARS-CoV-  
43 2 and respiratory secretions from COVID-19 patients be performed in biosafety level 3 (BSL3)  
44 containment laboratories. Therefore, it is imperative to develop viral inactivation procedures that  
45 permit samples to be transferred and manipulated at lower containment levels (i.e., BSL2), and  
46 maintain the fidelity of downstream assays to expedite the development of medical  
47 countermeasures (MCMs). We demonstrate optimal conditions for complete viral inactivation  
48 following fixation of infected cells with paraformaldehyde solution or other commonly-used  
49 branded reagents for flow cytometry, UVC inactivation in sera and respiratory secretions for  
50 protein and antibody detection assays, heat inactivation following cDNA amplification of single-  
51 cell emulsions for droplet-based single-cell mRNA sequencing applications, and extraction with  
52 an organic solvent for metabolomic studies. Thus, we provide a suite of protocols for viral  
53 inactivation of SARS-CoV-2 and COVID-19 patient samples for downstream contemporary  
54 immunology assays that facilitate sample transfer to BSL2, providing a conceptual framework for  
55 rapid initiation of high-fidelity research as the COVID-19 pandemic continues.

56

57 **Keywords**

58 SARS-CoV-2, single-cell RNA-seq, flow cytometry, serology, metabolomics, 10X Genomics

59

## 60 1. Introduction

61  
62 At the end of 2019, a novel betacoronavirus, SARS-CoV-2 (1), emerged from Wuhan in the Hubei  
63 province of China causing viral pneumonia that progressed to severe or critical disease in ~20%  
64 of infected patients, where in the most critical cases, patients would present with respiratory failure  
65 and require mechanical ventilator support in the intensive care unit (2-4). Since then, much  
66 research effort has been focused on better understanding pathogenesis and immunity to SARS-  
67 CoV-2 (5). However, due to the severity of disease, work with infectious patient samples (primarily  
68 samples from the airways) and active viral cultures require biosafety level 3 (BSL3) containment  
69 facilities as with other closely related betacoronaviruses including SARS-CoV and Middle Eastern  
70 Respiratory Syndrome–Coronavirus (MERS-CoV) (1, 6, 7). This can restrict research activity  
71 where containment facilities are not available. As the COVID-19 pandemic continues to surge  
72 with emergence of new variants (8), there is a continued need to conduct frontier research on  
73 COVID-19 immunology and pathogenesis to develop and refine medical counter measures  
74 (MCMs) to protect at risk populations and those disproportionately affected by COVID-19 disease  
75 (9-11). To facilitate this work, it is imperative to understand effective viral inactivation protocols  
76 that have minimal effects on assay readouts.

77  
78 Though SARS-CoV-2 shares ~80% sequence homology with SARS-CoV (1), it is essential to  
79 evaluate efficacy of existing inactivation procedures on novel, independent viral strains. For  
80 example, MERS-CoV is also closely related to SARS-CoV but there are notable differences in the  
81 inactivation efficacy using gamma-irradiation between the viruses (12, 13). Indeed, there have  
82 been earlier reports of efficient viral propagation and inactivation procedures for SARS-CoV-2  
83 using heat, fixatives/chemicals/surfactants (e.g., formaldehyde/Trizol<sup>®</sup>/Triton X-100), and UVC  
84 irradiation (14-19), which are comparable to SARS-CoV and MERS-CoV (12, 13, 20-22).  
85 However, though most of these studies highlight efficient and effective viral inactivation protocols  
86 (15-19), the effect of inactivation on the fidelity of downstream assay readouts and analysis  
87 remain largely unknown. Specifically, a detailed report on viral inactivation protocols and how they  
88 influence contemporary immunology assays is notably lacking. Contemporary immunological  
89 assays including ELISA/Luminex/Mesoscale assays for antibody/protein detection (9, 23-25),  
90 metabolomics (26, 27), high-dimensional (Hi-D) flow cytometry (9, 28-30), and multi-omics single-  
91 cell mRNA sequencing (scRNA-seq) (9, 31, 32) are vital resources to develop and evaluate MCMs  
92 for the ongoing COVID-19 pandemic.

93  
94 To address the need to successfully inactivate virus and permit transfer of material from BSL3 to  
95 a lower containment (i.e., BSL2) environment for high-fidelity downstream assays, we examined  
96 the efficiency of several viral inactivation methods for contemporary immunological assays  
97 including flow cytometry, serology/protein detection, scRNA-seq, and high-throughput  
98 metabolomic experiments using both culture-derived virus and infected respiratory samples from  
99 COVID-19 patients. Here, we report complete viral inactivation following fixation with 4% PFA or  
100 1.6X BD FACS<sup>™</sup> Lysis Solution (~2.5% formaldehyde and ~8.3% diethylene glycol) for 30 min at  
101 room temperature for flow cytometry, UVC inactivation at ~4,000  $\mu\text{watts}/\text{cm}^2$  for 30 min in sera  
102 and respiratory secretions for protein/antibody detection assays, heat inactivation following first-  
103 round cDNA amplification of single-cell emulsions for droplet-based scRNA-seq, and metabolite

104 extraction for 30 min with 4 volumes of a 1:1 acetonitrile:methanol solution with 12.5  $\mu\text{M/L}$  D5-  
105 benzoylhippuric acid at 4°C for metabolomic studies. These results will serve as conceptual  
106 framework and promote rapid initiation of cutting-edge immunology studies as the COVID-19  
107 pandemic continues to evolve and for other risk group 3 agents that require higher containment.

108

## 109 **2. Methods**

110

### 111 2.1 Ethics & Biosafety statements

112 COVID-19+ patients were recruited from the Intensive Care Units of Emory University, Emory St.  
113 Joseph's, Emory Decatur, and Emory Midtown Hospitals (severe) or the Emory Acute Respiratory  
114 Clinic (mild), and healthy adults were recruited from the Emory University Hospital. All studies  
115 were approved by the Emory Institutional Review Board (IRB) under protocol numbers  
116 IRB00058507, IRB00057983 and IRB00058271. Informed consent was obtained from the  
117 patients when they had decision making ability or from a legal authorized representative (LAR) if  
118 the patient was unable to provide consent. We collected both blood and non-induced sputum  
119 (healthy/mild) or endotracheal aspirate (ETA; severe). Study inclusion criteria included a  
120 confirmed COVID-19 diagnosis by PCR amplification of SARS-CoV-2 viral (v)RNA obtained from  
121 naso-/oro-pharyngeal swabs, age of 18 years or greater, and willingness and ability to provide  
122 informed consent. All work with infectious virus and respiratory samples from COVID-19 patients  
123 was conducted inside a biosafety cabinet within the Emory Health and Safety Office (EHSO)- and  
124 United States Department of Agriculture (USDA)-approved BSL3 containment facility in the Health  
125 Sciences Research Building at Emory University following protocols approved by the Institutional  
126 Biosafety Committee (IBC) and Biosafety Officer.

127

### 128 2.2 Virus and cells

129 African green monkey (*Cercopithecus aethiops*) kidney epithelial cells (Vero E6 cells; ATCC®  
130 CRL-1586™) were maintained in complete (c)DMEM containing: 1X DMEM supplemented with  
131 25 mM HEPES, 2 mM L-glutamine, 1 mM sodium pyruvate, 1X non-essential amino acids (NEAA),  
132 1X antibiotic/antimycotic solution (all from Corning) and 10% heat-inactivated FBS (Gibco), unless  
133 indicated otherwise. Human lung adenocarcinoma epithelial cells (Calu-3 cells; ATCC® HTB-  
134 55™) were maintained in cMEM containing: 1X MEM (Corning) supplemented with 1X  
135 antibiotic/antimycotic solution and 10% heat-inactivated FBS unless indicated otherwise. Primary  
136 leukocytes from the airways of severe COVID-19 patients were collected bedside via  
137 endotracheal aspiration (ETA) and whole blood collected by standard venipuncture, then  
138 processed as previously described (9). SARS-CoV-2 USA-WA1/2020 (hereafter SCV2-WA1) was  
139 provided by BEI Resources (Manassas, VA, USA). Virus was propagated in Vero E6 cells as  
140 previously described (16, 33) and titer determined by TCID<sub>50</sub> (TCID<sub>50</sub>/mL) or plaque assays  
141 (PFU/mL). Low-passage (P1 or P2) virus stocks were used throughout this study.

142

### 143 2.3 Infectivity assays

#### 144 2.3.1 Plaque Assays with Methylcellulose

145 Vero E6 cells were seeded in 6-well plates (Falcon) with  $5 \times 10^5$  cells/well in 5% DMEM 24 h prior  
146 to infection and checked to verify  $\geq 80\%$  confluency. 10-fold dilutions of virus, respiratory  
147 secretions, and/or scRNA-seq emulsion in serum-free DMEM (200  $\mu\text{L}$ ) were incubated on Vero

148 E6 monolayers for 1 h absorption at 37°C with rocking at 15 min intervals. After absorption, cells  
149 were overlain with 2% methylcellulose (MilliporeSigma) in 2% DMEM for 72 h at 37°C in a 5%  
150 CO<sub>2</sub>, humidified incubator. 72 h post-infection (hpi), methylcellulose was carefully removed, and  
151 cells gently rinsed once with 1X HBSS (Corning). Monolayers were fixed and plaques visualized  
152 with a solution of 0.4% crystal violet by weight in 80% methanol (MilliporeSigma) and 4% PFA  
153 (Electron Microscopy Sciences) for 20 min at room-temperature (RT).

154

### 155 2.3.2 *Plaque Assays with Agarose*

156 Vero E6 cells were seeded in 6-well plates with 5 x 10<sup>5</sup> cells/well in 5% DMEM 24 h prior to  
157 infection and checked to verify ≥80% confluency. 10-fold dilutions of virus, respiratory secretions,  
158 and/or scRNA-seq emulsion in serum-free DMEM (200 µL) were incubated on Vero E6  
159 monolayers for 1 h absorption at 37°C with rocking at 15 min intervals. After absorption, cells were  
160 overlain with 2 mL 0.5% immunodiffuse agarose (MP Biomedicals) in 1X DMEM supplemented  
161 with 5% FBS, 2 mM L-glutamine, 1 mM sodium pyruvate, 1X NEAA, 1X sodium bicarbonate, and  
162 1X antibiotic/antimycotic solution. 72 hpi, a second 2 mL overlay of 0.5% immunodiffuse agarose  
163 in a 1X HBSS solution with 0.026% neutral red (MilliporeSigma) was added for ≥3 h to visualize  
164 plaques.

165

### 166 2.3.3 *TCID<sub>50</sub> assays*

167 Vero E6 cells were seeded in 96-well plates with 2 x 10<sup>4</sup> cells/well in 5% MEM 24 h prior to  
168 infection and checked to verify ≥80% confluency. 10-fold dilutions of stock SCV2-WA1 virus in  
169 serum-free MEM (100 µL) were incubated on Vero E6 monolayers in quadruplicates for 2 h  
170 absorption at 37°C without rocking. Following absorption, the inoculum was removed, and cells  
171 cultured in 2% MEM. Cells were assessed daily for cytopathic effect (CPE) compared to mock-  
172 infected negative controls by microscopy for 6 d. Calculations for 50% tissue culture infectious  
173 dose (TCID<sub>50</sub>) were performed using either the Spearman-Käber (34) or Reed and Muench (35)  
174 methods as previously described (36).

175

### 176 2.3.4 *Focus Reduction Neutralization Assays (FRNA)*

177 Vero E6 cells were seeded in 96-well plates with 2 x 10<sup>4</sup> cells/well in 5% DMEM 24 h prior to  
178 infection and checked to verify ≥80% confluency. Dilutions of virus and/or virus treated with  
179 inactivation reagents in Opti-MEM™ (50 µL) were incubated on Vero E6 monolayers for 2 h  
180 absorption at 37°C without rocking. After absorption, cells were overlain with 2% methylcellulose  
181 in Opti-MEM™ (Gibco) supplemented with 2% FBS, 2.5 µg amphotericin B (MilliporeSigma), and  
182 20 µg/mL ciprofloxacin (MilliporeSigma) for 72 h at 37°C in a 5% CO<sub>2</sub>, humidified incubator. 72  
183 hpi, methylcellulose was carefully removed, and the cells fixed with 1:1 methanol/acetone mixture  
184 for 30 min at RT, then blocked with 200 µL 5% milk in 1X PBS for 20 min. Cells were incubated  
185 with an anti-SARS-CoV-2 spike RBD polyclonal antibody (Gentaur) at 1:3000 overnight at 37°C.  
186 Cells were washed to remove excess antibody, then incubated with a secondary HRP-conjugated  
187 anti-human IgG for 1 h at 37°C. Cells were washed to remove excess antibody and foci visualized  
188 using the TrueBlue™ Peroxidase Substrate (SeraCare Life Sciences) incubated for 1 h at RT with  
189 rocking prior to imaging with an ELISpot reader for foci quantification. Data reported as focus  
190 forming units per mL (FFU/mL).

191

#### 192 2.4 Inactivation by fixative solutions

193 Vero E6 cells were infected at a multiplicity of infection (MOI) of 0.01 and cultured in 6-well plates  
194 for 48 h with cMEM or cells from ETAs of COVID-19-infected patients were fixed with a freshly  
195 prepared 2% or 4% PFA solution (20% stock diluted in 1X HBSS; Electron Microscopy Sciences)  
196 or a 1.6X BD FACS™ Lysis Solution (1:6 in sterile dH<sub>2</sub>O; BD Biosciences) for the indicated time  
197 points at RT. Unfixed cells were incubated with 1X HBSS. Following fixation, cells from each  
198 condition were washed twice and resuspended in cMEM for an additional 48 h incubation at 37°C  
199 in a humidified, 5% CO<sub>2</sub> incubator. Culture supernatants were then collected and either plated  
200 immediately or frozen at -80°C for analysis by plaque assay.

201

#### 202 2.5 Inactivation by ultraviolet C (UVC) radiation

203 50-1000 µL aliquots of SCV2-WA1 virus stock (2.1 x 10<sup>5</sup> PFU/mL), respiratory supernatant  
204 (additional samples combined with our previously published data (9)), or patient sera were  
205 collected for UV inactivation. Samples were positioned 2-3 cm from the light source and exposed  
206 to 254 nm UVC light at maximum intensity (~4000 µwatts/cm<sup>2</sup>) for 30 min using a Spectrolinker™  
207 XL-1000 UV crosslinker (Spectronics Corporation) in either clear 2 mL microcentrifuge tubes  
208 (positioned on their side) or a 96-well plate (with the lid removed). Samples were either plated  
209 immediately or frozen at -80°C for analysis by plaque assay.

210

#### 211 2.6 Inactivation for metabolomic assays

212 To assess a nontoxic concentration of the metabolite extraction solvent (50% acetonitrile, 50%  
213 methanol, and 12.5 µM/L D5-benzoylhippuric acid) for subsequent FRNA, cytotoxicity tests were  
214 performed in Vero E6 cells via MTS assay using the CellTiter 96® Non-Radioactive Cell  
215 Proliferation kit (Promega) as previously described (37). Uninfected Vero E6 cells were incubated  
216 with the extraction solvent, diluted in Opti-MEM™ at 1:10, 1:100, and 1:1000 in triplicate at 37°C,  
217 5% CO<sub>2</sub> for 72 h with 100, 10, and 1 µM cycloheximide as positive control. After 72 h, the MTS  
218 tetrazolium compound was added to the cells and incubated for an additional 2 h. To determine  
219 the number of viable cells in each well, the absorbance was measured at 490 nm using a 96-well  
220 plate reader (BioTek). Cytotoxicity was expressed as the dilution of the extraction solvent that  
221 inhibited cell proliferation by 50% (IC<sub>50</sub>) and calculated using the Chou and Talalay method (38).  
222 SCV2-WA1 (2.5 x 10<sup>4</sup> TCID<sub>50</sub>/mL) was incubated with or without the extraction solvent (1:4) or  
223 Triton X-100 for 30 min at 4°C, then centrifuged at 20,000 x g for 10 min at 4°C. Supernatants  
224 were collected and diluted in Opti-MEM™ to final concentrations of 1:100 the extraction solvent  
225 or 1% Triton X-100, and >100 FFU/mL SARS-CoV-2 per well for analysis by FRNA.

226

#### 227 2.7 Inactivation for scRNA-seq (10X Genomics)

228 SARS-CoV-2-infected Vero E6 cells (MOI 0.04 for 72 h) or Calu-3 cells (MOI 0.04 for 48 h) were  
229 encapsulated for scRNA-seq following the manufacturer's protocol "Chromium Next GEM Single  
230 Cell V(D)J Reagent Kits v1.1 User Guide with Feature Barcode technology for Cell Surface  
231 Protein" (document number CG000208; 10X Genomics) targeting 20,000 and 10,000 cells,  
232 respectively. An aliquot of the emulsion was collected following encapsulation for analysis by  
233 plaque assay. The remaining emulsion was processed for cDNA synthesis reaction following the  
234 manufacturer's protocol with reagent volumes adjusted to reflect the reduced reaction volume  
235 after taking aliquots for plaque assays. Polymerase chain reaction (PCR) amplification profile was

236 45 min at 53°C followed by 5 min at 85°C. An additional aliquot of the cDNA suspension was  
237 collected following PCR reactions and either plated immediately or frozen at -80°C for analysis by  
238 plaque assay. Plaque assays were also performed on the encapsulation emulsion alone (without  
239 including virus-infected cells) to evaluate reagent cytotoxicity on Vero E6 monolayers.

240

#### 241 2.8 Luminex proteomic serology assays

242 Plasma from whole blood of COVID-19 patients was isolated via centrifugation at 400 x g for 10  
243 min at 4°C. To remove platelets, the isolated plasma was centrifuged at 4,000 x g for 10 min at  
244 4°C. Plasma samples were stored at -80°C until analyzed. Luminex serology assays were  
245 performed as previously described (24). In brief, ~50 µL of coupled microsphere mix was added  
246 to each well of 96-well clear-bottom black polystyrene microplates (Greiner Bio-One) at a  
247 concentration of 1,000 microspheres per region per well. All wash steps and dilutions were  
248 performed with 1% BSA in 1X PBS (hereafter assay buffer). Sera were assayed at 1:500 dilutions  
249 (in assay buffer) and surveyed for anti-SARS-CoV-2 N or RBD antibodies by 1 h incubation on a  
250 plate shaker at 800 rpm in the dark. Following incubation, wells were washed five times with 100  
251 µL of assay buffer using a BioTek 405 TS plate washer, then 3 µg/mL PE-conjugated goat anti-  
252 human IgA, IgG and/or IgM (Southern Biotech) was applied. After 30 min incubation, wells were  
253 washed three times in 100 µL of assay buffer, then resuspended in 100 µL of assay buffer for  
254 acquisition and analysis using a Luminex FLEXMAP 3D instrument and xPONENT 4.3 software  
255 (Luminex). Median fluorescent intensity (MFI) using combined or individual detection antibodies  
256 (i.e., anti-IgA, anti-IgG, or anti-IgM) was measured and the background value of assay buffer was  
257 subtracted from each serum sample result to obtain MFI minus background values (net MFI).

258

#### 259 2.9 Metabolomic assays

260 Metabolites in human plasma were extracted from the National Institute of Standards and  
261 Technology (NIST) "Standard Reference Materials 1950" after mock or UVC treatment by addition  
262 of four volumes of 50% acetonitrile, 50% methanol, and 12.5 µM/L benzoyl-D5-hippuric acid  
263 (extraction solvent). Samples were vortexed for 10 seconds, incubated on ice for 30 min, then  
264 centrifuged at 20,000 x g for 10 min at 4°C. The clear supernatant was aliquoted and injected (2.5  
265 µL) on a Vanquish Horizon liquid chromatograph coupled to Q Exactive High Field  
266 (ThermoFisher). A 150 mm x 2.1 mm ZIC-HILIC (MilliporeSigma) column and matching guard  
267 column were used to separate polar metabolites. Metabolites were ionized in both positive and  
268 negative mode and analyzed in full scan mode (67-1000 m/z). Pooled quality control samples  
269 comprising equal proportions of every study sample were used to generate ddMS2 (Top20N)  
270 spectra of metabolites, evaluate assay reproducibility, and correct batch drift. Compound  
271 Discoverer 3.2 (ThermoFisher) was used to quantify peak areas and assign annotations based  
272 on a local library of reference standards or via matching metabolites to reference spectra in  
273 mzCloud (mzcloud.org). Data were imported to Prism 9 for graphing and statistical analyses by  
274 unpaired t-tests for untreated versus UVC-treated replicates, assuming individual variance, using  
275 the adaptive linear (two-step) step-up (Benjamini, Krieger, and Yekutieli) method (39) to control  
276 the false discovery rate (FDR), and a desired FDR (Q) of 10% for multiple comparisons.

277

#### 278 2.10 scRNA-seq data alignment, dimensionality reduction, and clustering

279 The Cell Ranger Software (v.5.0.0; 10X Genomics) was used to perform cell barcode processing  
280 and single-cell 5' unique molecular identifier (UMI) counting. To detect SARS-CoV-2 reads, a  
281 customized reference genome was built by integrating human GRCh38 and SARS-CoV-2  
282 genomes (severe acute respiratory syndrome coronavirus 2 isolate Wuhan-Hu-1, complete  
283 genome, GenBank MN908947.3). Splicing-aware aligner STAR (40) was used in FASTQ  
284 alignments. Cell barcodes were then determined based on the distribution of UMI counts  
285 automatically. The filtered gene-barcode matrices were first normalized using 'LogNormalize'  
286 method in Seurat v.3 (41) with default parameters. The top 2,000 variable genes were then  
287 identified using the 'vst' method by the 'FindVariableFeatures' function. Principal Component  
288 Analysis (PCA) was performed using the top 2,000 variable genes, then UMAPs generated using  
289 the top 30 principal components to visualize cells. Graph-based clustering was performed on the  
290 PCA-reduced data for clustering analysis with the resolution set to 0.8 to obtain the clusters. The  
291 total viral UMIs were the sum of the UMIs of the 12 SARS-CoV-2 genes (42).

292

### 293 2.11 *SARS-CoV-2 quantitative reverse transcription PCR (RT-qPCR)*

294 Stock SCV2-WA1 virus and patient samples (400  $\mu$ L) were thoroughly mixed 1:1 with 2X  
295 DNA/RNA Shield™ and incubated at RT for 20 min for inactivation and vRNA was extracted using  
296 the *Quick-RNA*™ Viral Kit (Zymo Research) following the manufacturer's protocol. Complimentary  
297 (c)DNA was synthesized using the High-Capacity cDNA Reverse Transcription Kit (Applied  
298 Biosystems™) per manufacturer's instructions and diluted 1:5 in nuclease-free water, then 10  $\mu$ L  
299 of diluted cDNA was used with the NEB Luna Universal Probe qPCR Mastermix (New England  
300 BioLabs®) following the manufacturer's protocol and RT-qPCR performed in 384-well plates using  
301 a QuantStudio™ 5 Real-Time PCR System (Applied Biosystems™). Primer/probe pairs were:  
302 AGAAGATTGGTTAGATGATGATAGT (forward primer), TTCCATCTCTAATTGAGGTTGAACC  
303 (reverse primer), and /56-FAM/TCCTCACTGCCGTCTTGTTGACCA/3IABkFQ/ (probe), which  
304 were designed from sequences previously described (43) (Integrated DNA Technologies; IDT).  
305 To generate a standard curve and quantify SARS-CoV-2 genome copies, a gBlock with the  
306 sequence:

307 AATTAAGAACACGTCACCGCAAGAAGAAGATTGGTTAGATGATGATAGTCAACAACTGTT  
308 GGTCACAAGACGGCAGTGAGGACAATCAGACAATACTATTCAAACAATTGTTGAGGTTCC  
309 AACCTCAATTAGAGATGGAACCTTACAGTTTCAGTGTTCAATTAA (IDT) was used as a  
310 standard.

311

312 To determine PFU equivalents (ePFU) from respiratory samples, vRNA was extracted from 10-  
313 fold serial dilutions of stock SCV2-WA1 of a known titer for RT-qPCR to generate a standard  
314 curve from which number of genome copies per PFU could be extrapolated as previously  
315 described (44). Culture supernatants from mock- (1X HBSS) and SARS-CoV-2-infected Calu-3  
316 (MOI 0.04) cells were utilized as additional controls.

317

## 318 3. Results

319

### 320 3.1 *Inactivation by fixation*

321 To evaluate the ability of commonly-used fixatives in flow cytometry (here, formaldehyde-based  
322 and PFA) to completely inactivate SARS-CoV-2-infected cells for transfer to lower containment



323 settings, we performed a time-course of inactivation (Fig. 1A) using 2% and 4% PFA (diluted from  
324 a 20% stock, see methods) along with 1.6X BD FACS™ Lysis Solution (10X stock diluted 1:6 in  
325 sterile dH<sub>2</sub>O). Cells exposed to 2% and 4% PFA for 15 min at room temperature were still able to  
326 produce infectious virus when returned to culture for 48 h (Fig. 1B,C), with a decrease in viral titer  
327 (PFU/mL). This is in contrast to a previous report that indicated 10 min treatment with 4% PFA is  
328 sufficient to inactivate virus (14). However, infectious virus was not detected by plaque assay  
329 following 15 min exposure to 1.6X BD FACS™ lysis solution and at all subsequent time points  
330 (Fig. 1B,C). Cells treated with 4% PFA for 30 min at RT were no longer infectious, however, 60  
331 min was required to fully inactivate virus in cells treated with 2% PFA at RT. These data indicate  
332 that common fixation protocols (30 min fixation at RT) for commercially-available fixatives,  
333 specifically those with ≥4% PFA, are sufficient for inactivating SARS-CoV-2 infected cells.

334

335

### 336 3.2 UVC inactivation

#### 337 3.2.1 Inactivation of respiratory secretions and viral stocks

338 Though complete inactivation of SARS-CoV viral stocks can be achieved with <15 min exposure  
339 to UVC-irradiation (12), a follow-up report for SARS-CoV inactivation in non-cellular blood  
340 products in PBS solutions recommended 40 min exposure to inactivate virus (20). Therefore, we  
341 selected 30 min exposure to UVC-irradiation at maximum intensity (~4000 μwatt/cm<sup>2</sup>) for both  
342 culture-derived SARS-CoV-2 viral stocks and respiratory secretions from COVID-19 patients.  
343 First, we determined viral load in the respiratory secretions by extrapolating ePFU/mL from RT-  
344 qPCR results of respiratory secretions (see methods) (44). Using a standard curve generated  
345 from virus stock of a known titer (Fig. 2A), we determined 1 PFU to be equivalent to 73 SARS-  
346 CoV-2 genome copies in RT-qPCR data. This allowed for more accurate viral detection and  
347 quantification (Fig. 2B) since endotracheal aspirate (ETA) and bronchoalveolar lavage fluid  
348 (BALF) samples are standard modalities used to diagnose ventilator-associated pneumonia (45,  
349 46) and can be inundated with pulmonary microbes that grow in cultures, confounding traditional  
350 plaque assays (see Fig. S1). As expected from our previous study (9), we found that viral load  
351 varied across patient groups where those with severe disease had lower (or absent) viral load at  
352 time of sampling (samples were combined with our previously data (9); Fig. 2B). Following 30 min  
353 exposure to UVC-irradiation, both virus stock (2.1 x 10<sup>5</sup> PFU/mL), and respiratory secretions were  
354 not detected by plaque assay (Fig. 3C), indicating complete viral inactivation. Additionally, we  
355 demonstrate that UVC-inactivation abolishes microbial growth in plaque assays that hampered  
356 accurate viral load detection in ETA samples (Fig. S1), which is consistent with established  
357 efficacy of UVC-inactivation for a diverse range of pathogenic microbes (47, 48).

358

#### 359 3.2.2 Effects on antibody measurements

360 To determine the effect of 30 min exposure to UVC-irradiation on protein/antibody detection, we  
361 compared untreated and UVC-treated plasma samples from both mild and severe COVID-19  
362 patients (Fig. 2D). We did not observe any significant differences in the levels of anti-SARS-CoV-  
363 2 antibodies detected by Luminex proteomic assays. Collectively, these data indicate that 30 min  
364 exposure to UVC-irradiation at maximum intensity (~4000 μwatt/cm<sup>2</sup>) is both effective on  
365 inactivating high titer stock SARS-CoV-2 and respiratory secretions from COVID-19 patients, with  
366 minimal effect on downstream protein/antibody assays.

367

### 368 3.3 Inactivation for metabolomics

#### 369 3.3.1 UVC treatment

370 To determine optimal inactivation procedure for metabolomics, we first evaluated the effects of  
371 UVC-inactivation described above on Standard Reference Material 1950 of metabolites in human  
372 plasma (49). UVC-inactivation significantly altered the metabolic profile of samples (Fig. 3A). We  
373 show that the differentially-expressed metabolites between untreated and UVC-treated plasma  
374 samples are redox active metabolites (Fig. 3B), suggesting that reactive oxygen species (ROS)  
375 known to be produced during UVC irradiation (50) lead to sample oxidation during this procedure  
376 – similar to ROS oxidation in vivo (51-53). Therefore, UVC-inactivation is not suitable for  
377 metabolomic studies, especially if interrogating redox active metabolites.

378

#### 379 3.3.2 Treatment with organic solvents

380 We then wanted to test if the standard metabolomic sample extraction procedure with organic  
381 solvents (see methods), could successfully inactivate SARS-CoV-2-infected non-cellular products  
382 (such as respiratory secretions or plasma) as an alternative to UVC-inactivation. Specifically, we  
383 used a 1:1 mixture of acetonitrile and methanol including a deuterated internal standard,  
384 administered at 4 volumes relative to starting sample. We performed FRNAs with stock SCV2-  
385 WA1 (untreated), and virus treated with either the extraction solvent or Triton X-100, which has  
386 been shown to inactivate SARS-CoV-2 (17, 18). Incubation of SCV2-WA1 virus stock 1:4 with the  
387 extraction solvent was sufficient to fully inactivate virus along with Triton X-100 (Fig. 3C). Cells  
388 incubated with the extraction solvent remained viable (Fig. 3C), confirming virus inactivation  
389 independent of Vero E6 cytotoxicity, which was observed for other chemical reagents/surfactant  
390 such as Triton X-100 (Fig. 3C). Therefore, these results demonstrate that the standard  
391 metabolomic assay sample processing procedure with 4 volumes of our extraction solvent is  
392 sufficient to inactivate SARS-CoV-2-infected non-cellular samples while retaining sample integrity  
393 as compared to UVC-inactivation.

394

#### 395 3.4 Inactivation for scRNA-seq

396 To better understand efficacy of SARS-CoV-2 inactivation in droplet-based scRNA-seq  
397 pipelines—specifically the 10X Genomics platform—we evaluated viral inactivation at the two  
398 early steps in the manufacturer’s instructions. First, we evaluated the reagent cytotoxicity of the  
399 10X Genomics encapsulation emulsion on Vero E6 cells by performing plaque assays with the  
400 emulsion free of encapsulated cells. We demonstrate that the reagents in the emulsion (many of  
401 which are proprietary) are not inherently cytotoxic to Vero E6 monolayers, allowing us to evaluate  
402 viral inactivation by standard plaque assay (Fig.4a).

403

404 We next evaluated the efficacy of viral inactivation following single-cell encapsulation (which  
405 contains a proprietary lysis solution) of SCV2-WA1-infected (MOI 0.04) Vero E6 or Calu-3 cells.  
406 We show that the standard single-cell encapsulation step alone is not sufficient to fully inactivate  
407 SARS-CoV-2, which could be detected in subsequent plaque assays (Fig. 4A,B). Therefore, we  
408 tested the efficacy of the first round cDNA synthesis reaction, which includes exposure to  
409 temperatures  $\geq 53^{\circ}\text{C}$ , in viral inactivation. We show that after the PCR reaction (45 min at  $53^{\circ}\text{C}$   
410 followed by 5 min at  $85^{\circ}\text{C}$ ), infectious SARS-CoV-2 was not detectable by plaque assay (Fig.

411 4A,B). Taken together, our data demonstrate that scRNA-seq emulsions of SARS-CoV-2-infected  
412 cells are fully inactivated only after heat inactivation following the cDNA synthesis reaction using  
413 the conditions described in the manufacturer's protocol (45 min at 53°C followed by 5 min at 85°C),  
414 which can then be transferred to lower containment for library preparation and sequencing.  
415 Indeed, after sequencing, we find >2.3 million viral transcripts (or unique molecular identifiers;  
416 UMI) in ~8,000 SCV2-WA1-infected Calu-3 cells (Fig. 4C).

417

#### 418 **4. Discussion**

419

420 To date, there have been multiple studies to evaluate efficacy of viral inactivation procedures  
421 using heat, chemicals, and UVC irradiation on SARS-CoV-2-infected samples (14-18). Many of  
422 these studies have evaluated traditional procedures established for SARS-CoV and MERS-CoV  
423 and were found to have comparable efficacies (12, 13, 20, 21). Here, we add to these studies by  
424 evaluating inactivation procedures performed under optimized conditions that allow for  
425 downstream processing/analysis for contemporary immunology assays with limited effects on  
426 assay readouts. We caution that all procedures are performed under the specified conditions and  
427 those that differ from what have been described here should be evaluated on viral stocks and  
428 patient samples before transferring to lower biosafety containment.

429

430 Since its induction in the 1960s, flow cytometry has been the preeminent technology for single-  
431 cell analysis (54) particularly for investigating the heterogeneity of the immune system in health  
432 and disease (55, 56). Indeed, Hi-D flow cytometry has been a pivotal tool in dissecting the  
433 complex immunophenotypes of leukocytes in COVID-19 (9, 29, 30, 57, 58). We evaluated the  
434 ability of commercially-available fixatives commonly used in flow cytometry (formaldehyde-based)  
435 to fully inactivate SARS-CoV-2-infected cells to facilitate transfer of cells from BSL3 to BSL2 for  
436 data acquisition (9). Here, we show that treatment with 4% PFA or 1.6X BD FACS™ Lysis solution  
437 for 30 min at RT was sufficient to completely inactivate SARS-CoV-2-infected cells, even at viral  
438 titers higher than in cells from infected patients. Therefore, most common fixation protocols and  
439 reagents (e.g., BD Cytotfix/Cytoperm™, BioLegend® Fixation Buffer, etc.) that contain ≥4% PFA  
440 are suitable for preparing fluorescently-stained, SARS-CoV-2-infected cells for transfer out of  
441 BSL3 containment after 30 min exposure. Conversely, lower concentrations of PFA (i.e., 2%)  
442 required longer exposure time (at least 60 min at RT) to fully inactivate samples.

443

444 Similarly, we show that UVC irradiation (~4000 μwatts/cm<sup>2</sup>) for 30 min is sufficient to fully  
445 inactivate high titer SCV2-WA1 viral stocks and respiratory supernatants from patients with  
446 minimal effects on protein/antibody detection (59), which will promote further studies on  
447 secretions from ETA and/or BALF to better understand local versus systemic responses (9, 25).  
448 It is important to note that a previous study on UVC-inactivation of SARS-CoV found BSA to  
449 protect virus from UVC-inactivation even after 60 min exposure (20). Therefore, we avoided BSA  
450 in solutions used in respiratory sample preparation (9), and plasma samples were inactivated  
451 prior to dilution in the Luminex proteomic assay buffer (1% BSA in 1X PBS, see methods).

452

453 Despite having negligible effects in the proteomic assays, we did observe that UVC inactivation  
454 significantly altered metabolomic profiles in human plasma samples. Specifically, we show that

455 redox active metabolites such as methionine and urate are oxidized following UVC inactivation,  
456 significantly increasing signals for methionine sulfoxide and allantoin, respectively (51, 52).  
457 Similarly, bilirubin, which is oxidized to biliverdin, is significantly decreased with UVC treatment  
458 (53). Therefore, UVC-inactivation of clinical samples could lead to misleading biological  
459 interpretations, artificially skewing sample metabolites to a more oxidized profile (51-53).  
460 However, high concentration methanol ( $\geq 80\%$ ) (60, 61) and methanol/acetone mixtures (13, 22)  
461 have previously been shown to successfully inactivate many viral infected samples including  
462 SARS-CoV-2 (17-19). The extraction solvent we used is similar to that used in many metabolomic  
463 sample preparation techniques, and was sufficient to inactivate virus while maintaining data  
464 integrity.

465  
466 Systems immunology approaches, including multi-omic scRNA-seq, have greatly advanced our  
467 understanding of COVID-19 immunity and pathogenesis (9, 31, 32). However, a detailed report  
468 on inactivation efficacy of scRNA-seq pipelines is notably lacking. We demonstrate that in the  
469 standard 10X Genomics pipeline, encapsulation alone was insufficient to fully inactivate virus.  
470 According to the manufacturer's guidelines, a cDNA synthesis reaction is the next immediate step  
471 after encapsulation (see methods). Though many studies have evaluated the efficacy of heat  
472 inactivation for SARS-CoV-2 and demonstrated 45 min at 56°C and 5 min at 100°C are sufficient  
473 to fully inactivate virus (14-19), none have tested the specific conditions for the cDNA synthesis  
474 reaction (45 min at 53°C followed by 5 min at 85°C). Here, we expand on the previous studies by  
475 demonstrating that the cDNA synthesis reaction in the standard 10X Genomics pipeline  
476 successfully inactivates SARS-CoV-2 and allows for transfer to lower containment for subsequent  
477 processing and library generation procedures.

478  
479 Thus, we report optimized methods of viral inactivation that have minimal, if any, adverse impact  
480 on immunological studies of infected culture-derived and patient samples, permitting safe transfer  
481 to lower containment laboratories (BSL2) for final processing and data acquisition. Taken  
482 together, this suite of inactivation procedures can serve as guidelines for rapid initiation of  
483 research as the COVID-19 pandemic continues.

484  
485

486 **Acknowledgements**

487

488 This work was supported by funds from NIH/NIAID R01AI123126 (EEBG) and R01AI123126-  
489 05S1 (EEBG), NIH T32-HL116271-07 (RPR), the Program for Breakthrough Biomedical  
490 Research, and Lowance Center for Human Immunology (EEBG), the NSF EAGER award  
491 2032273 (RT, RFS, KZ), and the Woodruff Health Science Center COVID-19 CURE award (RT,  
492 RFS, KZ). DJE was supported, in part, by the Laney Graduate School Fellowship (Emory) and  
493 JDC was supported, in part, by CF@LANTA, a component of Emory University and Children's  
494 Healthcare of Atlanta. The funders had no role in study design, data collection and analysis,  
495 decision to publish, or preparation of the manuscript. We thank Fred Souret (10X Genomics) for  
496 providing additional reaction kits to test viral inactivation in scRNA-seq assays, Doan Nguyen for  
497 technical direction with the serology experiments, and the Emory Pediatric/Winship Flow  
498 Cytometry Core (access supported in part by Children's Healthcare of Atlanta) for their support  
499 with flow cytometry experiments. We thank Rafi Ahmed (Emory) and Jacob Kohlmeier (Emory)  
500 for kindly providing the Vero E6 and Calu-3 cell lines, respectively. We thank Ann Chahroudi, Nils  
501 Schoof, Kira Moresco, and Stacy Heilman of the Department of Pediatrics (Emory), along with  
502 the Emory Biosafety Officers Kalpana Rengarajan and Esmeralda Meyer and the Institutional  
503 Biosafety Committee (IBC) for their assistance with the BSL3 facility and protocol review/approval.

504

505 **Declaration of interest**

506

507 FEL is the founder of MicroB-plex, Inc., serves on the SAB of Be Bio Pharma, receives grants  
508 from BMGF and Genentech, and receives royalties from BLI, inc. All other authors have no  
509 competing interest to declare.

510

511 **Author contributions**

512

513 **Devon J. Eddins**: Conceptualization, Data curation, Formal analysis, Investigation, Methodology,  
514 Validation, Visualization, Writing - original draft, Revising & editing – final draft. **Leda Bassit**:  
515 Investigation, Methodology, Data curation, Formal Analysis, Visualization. **Joshua D. Chandler**:  
516 Investigation, Methodology, Data curation, Formal Analysis, Visualization. **Natalie S. Haddad**  
517 Investigation, Data curation, Formal Analysis. **Katie L. Musall**: Investigation. **Junkai Yang**:  
518 Formal Analysis, Visualization. **Astrid Kusters**: Investigation. **Brian S. Dobosh**: Investigation,  
519 Formal Analysis. **Mindy R. Hernández**: Resources. **Richard P. Ramonell**: Resources. **Rabindra**  
520 **M. Tirouvanziam**: Supervision, Resources, Data curation. **F. Eun-Hyung Lee**: Supervision,  
521 Resources, Data curation. **Keivan Zandi**: Resources, Investigation, Methodology, Data curation,  
522 Formal analysis, Supervision. **Raymond F. Schinazi**: Supervision, Resources, Data curation.  
523 **Eliver E.B. Ghosn**: Conceptualization, Data curation, Formal analysis, Funding acquisition,  
524 Methodology, Project administration, Resources, Supervision, Visualization, Writing – original  
525 draft; Revising & editing – final draft. All authors discussed the results and read and approved the  
526 final manuscript.

527

528

529 **Literature Cited**

530

- 531 1. Gorbalenya AE, Baker SC, Baric RS, de Groot RJ, Drosten C, Gulyaeva AA, et al. The  
532 species Severe acute respiratory syndrome-related coronavirus: classifying 2019-nCoV and  
533 naming it SARS-CoV-2. *Nat Microbiol.* 2020 Apr;5(4):536-44.
- 534 2. Huang C, Wang Y, Li X, Ren L, Zhao J, Hu Y, et al. Clinical features of patients infected  
535 with 2019 novel coronavirus in Wuhan, China. *Lancet.* 2020 Feb 15;395(10223):497-506.
- 536 3. Merad M, Martin JC. Pathological inflammation in patients with COVID-19: a key role for  
537 monocytes and macrophages. *Nat Rev Immunol.* 2020 Jun;20(6):355-62.
- 538 4. Wu C, Chen X, Cai Y, Xia J, Zhou X, Xu S, et al. Risk Factors Associated With Acute  
539 Respiratory Distress Syndrome and Death in Patients With Coronavirus Disease 2019  
540 Pneumonia in Wuhan, China. *JAMA Intern Med.* 2020 Jul 1;180(7):934-43.
- 541 5. Carvalho T, Krammer F, Iwasaki A. The first 12 months of COVID-19: a timeline of  
542 immunological insights. *Nat Rev Immunol.* 2021 Apr;21(4):245-56.
- 543 6. de Wit E, van Doremalen N, Falzarano D, Munster VJ. SARS and MERS: recent insights  
544 into emerging coronaviruses. *Nat Rev Microbiol.* 2016 Aug;14(8):523-34.
- 545 7. Graham RL, Donaldson EF, Baric RS. A decade after SARS: strategies for controlling  
546 emerging coronaviruses. *Nat Rev Microbiol.* 2013 Dec;11(12):836-48.
- 547 8. Harvey WT, Carabelli AM, Jackson B, Gupta RK, Thomson EC, Harrison EM, et al.  
548 SARS-CoV-2 variants, spike mutations and immune escape. *Nat Rev Microbiol.* 2021  
549 Jul;19(7):409-24.
- 550 9. Eddins DJ, Yang J, Kusters A, Giacalone V, Pechuan X, Chandler JD, et al. Pathogenic  
551 neutrophilia drives acute respiratory distress syndrome in severe COVID-19 patients. *bioRxiv.*  
552 2021.
- 553 10. Romano SD, Blackstock AJ, Taylor EV, El Burai Felix S, Adjei S, Singleton CM, et al.  
554 Trends in Racial and Ethnic Disparities in COVID-19 Hospitalizations, by Region - United  
555 States, March-December 2020. *MMWR Morb Mortal Wkly Rep.* 2021 Apr 16;70(15):560-5.
- 556 11. Van Dyke ME, Mendoza MCB, Li W, Parker EM, Belay B, Davis EM, et al. Racial and  
557 Ethnic Disparities in COVID-19 Incidence by Age, Sex, and Period Among Persons Aged <25  
558 Years - 16 U.S. Jurisdictions, January 1-December 31, 2020. *MMWR Morb Mortal Wkly Rep.*  
559 2021 Mar 19;70(11):382-8.
- 560 12. Darnell ME, Subbarao K, Feinstone SM, Taylor DR. Inactivation of the coronavirus that  
561 induces severe acute respiratory syndrome, SARS-CoV. *J Virol Methods.* 2004 Oct;121(1):85-  
562 91.
- 563 13. Kumar M, Mazur S, Ork BL, Postnikova E, Hensley LE, Jahrling PB, et al. Inactivation  
564 and safety testing of Middle East Respiratory Syndrome Coronavirus. *J Virol Methods.* 2015  
565 Oct;223:13-8.
- 566 14. Case JB, Bailey AL, Kim AS, Chen RE, Diamond MS. Growth, detection, quantification,  
567 and inactivation of SARS-CoV-2. *Virology.* 2020 Sep;548:39-48.
- 568 15. Inagaki H, Saito A, Sugiyama H, Okabayashi T, Fujimoto S. Rapid inactivation of SARS-  
569 CoV-2 with deep-UV LED irradiation. *Emerging Microbes & Infections.* 2020;9(1):1744-7.
- 570 16. Jureka AS, Silvas JA, Basler CF. Propagation, Inactivation, and Safety Testing of SARS-  
571 CoV-2. *Viruses.* 2020 Jun 6;12(6).
- 572 17. Patterson EI, Prince T, Anderson ER, Casas-Sanchez A, Smith SL, Cansado-Utrilla C,  
573 et al. Methods of Inactivation of SARS-CoV-2 for Downstream Biological Assays. *J Infect Dis.*  
574 2020 Oct 1;222(9):1462-7.
- 575 18. Welch SR, Davies KA, Buczkowski H, Hettiarachchi N, Green N, Arnold U, et al.  
576 Analysis of inactivation of SARS-CoV-2 by specimen transport media, nucleic acid extraction  
577 reagents, detergents, and fixatives. *Journal of clinical microbiology.* 2020;58(11).

- 578 19. Widera M, Westhaus S, Rabenau HF, Hoehl S, Bojkova D, Cinatl J, Jr., et al. Evaluation  
579 of stability and inactivation methods of SARS-CoV-2 in context of laboratory settings. *Med*  
580 *Microbiol Immunol*. 2021 Aug;210(4):235-44.
- 581 20. Darnell ME, Taylor DR. Evaluation of inactivation methods for severe acute respiratory  
582 syndrome coronavirus in noncellular blood products. *Transfusion*. 2006 Oct;46(10):1770-7.
- 583 21. Rabenau HF, Cinatl J, Morgenstern B, Bauer G, Preiser W, Doerr HW. Stability and  
584 inactivation of SARS coronavirus. *Med Microbiol Immunol*. 2005 Jan;194(1-2):1-6.
- 585 22. Kariwa H, Fujii N, Takashima I. Inactivation of SARS coronavirus by means of povidone-  
586 iodine, physical conditions and chemical reagents. *Dermatology*. 2006;212 Suppl 1(Suppl  
587 1):119-23.
- 588 23. Clemente A, Alba-Patiño A, Santopolo G, Rojo-Molinero E, Oliver A, Borges M, et al.  
589 Immunodetection of Lung IgG and IgM Antibodies against SARS-CoV-2 via Enzymatic  
590 Liquefaction of Respiratory Samples from COVID-19 Patients. *Anal Chem*. 2021 Mar  
591 30;93(12):5259-66.
- 592 24. Haddad NS, Nguyen DC, Kuruvilla ME, Morrison-Porter A, Anam F, Cashman KS, et al.  
593 One-Stop Serum Assay Identifies COVID-19 Disease Severity and Vaccination Responses.  
594 *ImmunoHorizons*. 2021;5(5):322-35.
- 595 25. Sterlin D, Mathian A, Miyara M, Mohr A, Anna F, Claër L, et al. IgA dominates the early  
596 neutralizing antibody response to SARS-CoV-2. *Sci Transl Med*. 2021 Jan 20;13(577).
- 597 26. Bernatchez JA, McCall LI. Insights gained into respiratory infection pathogenesis using  
598 lung tissue metabolomics. *PLoS Pathog*. 2020 Jul;16(7):e1008662.
- 599 27. Olszewski KL, Morrissey JM, Wilinski D, Burns JM, Vaidya AB, Rabinowitz JD, et al.  
600 Host-parasite interactions revealed by *Plasmodium falciparum* metabolomics. *Cell Host*  
601 *Microbe*. 2009 Feb 19;5(2):191-9.
- 602 28. Brummelman J, Haftmann C, Núñez NG, Alvisi G, Mazza EMC, Becher B, et al.  
603 Development, application and computational analysis of high-dimensional fluorescent antibody  
604 panels for single-cell flow cytometry. *Nat Protoc*. 2019 Jul;14(7):1946-69.
- 605 29. Lourda M, Dzidic M, Hertwig L, Bergsten H, Palma Medina LM, Sinha I, et al. High-  
606 dimensional profiling reveals phenotypic heterogeneity and disease-specific alterations of  
607 granulocytes in COVID-19. *Proc Natl Acad Sci U S A*. 2021 Oct 5;118(40).
- 608 30. Mathew D, Giles JR, Baxter AE, Oldridge DA, Greenplate AR, Wu JE, et al. Deep  
609 immune profiling of COVID-19 patients reveals distinct immunotypes with therapeutic  
610 implications. *Science*. 2020 Sep 4;369(6508).
- 611 31. Stephenson E, Reynolds G, Botting RA, Calero-Nieto FJ, Morgan MD, Tuong ZK, et al.  
612 Single-cell multi-omics analysis of the immune response in COVID-19. *Nat Med*. 2021  
613 May;27(5):904-16.
- 614 32. Su Y, Chen D, Yuan D, Lausted C, Choi J, Dai CL, et al. Multi-Omics Resolves a Sharp  
615 Disease-State Shift between Mild and Moderate COVID-19. *Cell*. 2020 Dec 10;183(6):1479-  
616 95.e20.
- 617 33. Zandi K, Musall K, Oo A, Cao D, Liang B, Hassandarvish P, et al. Baicalein and Baicalin  
618 Inhibit SARS-CoV-2 RNA-Dependent-RNA Polymerase. *Microorganisms*. 2021 Apr 22;9(5).
- 619 34. Kärber G. Tabellen zur näherungsweise Bestimmung von Titern. *Naunyn-*  
620 *Schmiedeberg's Arch exper Path Pharmacol*. 1931;162:480.
- 621 35. Reed LJ, Muench H. A simple method of estimating fifty per cent endpoints. *American*  
622 *journal of epidemiology*. 1938;27(3):493-7.
- 623 36. Ramakrishnan MA. Determination of 50% endpoint titer using a simple formula. *World J*  
624 *Virol*. 2016 May 12;5(2):85-6.
- 625 37. Stuyver LJ, Lostia S, Adams M, Mathew JS, Pai BS, Grier J, et al. Antiviral activities and  
626 cellular toxicities of modified 2',3'-dideoxy-2',3'-didehydrocytidine analogues. *Antimicrob Agents*  
627 *Chemother*. 2002 Dec;46(12):3854-60.



- 628 38. Chou T-C, Talalay P. Quantitative analysis of dose-effect relationships: the combined  
629 effects of multiple drugs or enzyme inhibitors. *Advances in enzyme regulation*. 1984;22:27-55.
- 630 39. Benjamini Y, Krieger AM, Yekutieli D. Adaptive linear step-up procedures that control the  
631 false discovery rate. *Biometrika*. 2006;93(3):491-507.
- 632 40. Dobin A, Davis CA, Schlesinger F, Drenkow J, Zaleski C, Jha S, et al. STAR: ultrafast  
633 universal RNA-seq aligner. *Bioinformatics*. 2013 Jan 1;29(1):15-21.
- 634 41. Stuart T, Butler A, Hoffman P, Hafemeister C, Papalexi E, Mauck WM, 3rd, et al.  
635 Comprehensive Integration of Single-Cell Data. *Cell*. 2019 Jun 13;177(7):1888-902.e21.
- 636 42. Kim D, Lee JY, Yang JS, Kim JW, Kim VN, Chang H. The Architecture of SARS-CoV-2  
637 Transcriptome. *Cell*. 2020 May 14;181(4):914-21.e10.
- 638 43. Lu R, Zhao X, Li J, Niu P, Yang B, Wu H, et al. Genomic characterisation and  
639 epidemiology of 2019 novel coronavirus: implications for virus origins and receptor binding. *The  
640 lancet*. 2020;395(10224):565-74.
- 641 44. Perkins SM, Webb DL, Torrance SA, El Saleeby C, Harrison LM, Aitken JA, et al.  
642 Comparison of a real-time reverse transcriptase PCR assay and a culture technique for  
643 quantitative assessment of viral load in children naturally infected with respiratory syncytial  
644 virus. *J Clin Microbiol*. 2005 May;43(5):2356-62.
- 645 45. Cook D, Mandell L. Endotracheal aspiration in the diagnosis of ventilator-associated  
646 pneumonia. *Chest*. 2000 Apr;117(4 Suppl 2):195s-7s.
- 647 46. Scholte JB, van Dessel HA, Linssen CF, Bergmans DC, Savelkoul PH, Roekaerts PM, et  
648 al. Endotracheal aspirate and bronchoalveolar lavage fluid analysis: interchangeable diagnostic  
649 modalities in suspected ventilator-associated pneumonia? *J Clin Microbiol*. 2014  
650 Oct;52(10):3597-604.
- 651 47. Kurth J, Waldmann R, Heith J, Mausbach K, Burian R. Efficient inactivation of viruses  
652 and mycoplasma in animal sera using UVC irradiation. *Dev Biol Stand*. 1999;99:111-8.
- 653 48. Terpstra FG, van 't Wout AB, Schuitemaker H, van Engelenburg FA, Dekkers DW,  
654 Verhaar R, et al. Potential and limitation of UVC irradiation for the inactivation of pathogens in  
655 platelet concentrates. *Transfusion*. 2008 Feb;48(2):304-13.
- 656 49. Simón-Manso Y, Lowenthal MS, Kilpatrick LE, Sampson ML, Telu KH, Rudnick PA, et al.  
657 Metabolite profiling of a NIST Standard Reference Material for human plasma (SRM 1950): GC-  
658 MS, LC-MS, NMR, and clinical laboratory analyses, libraries, and web-based resources. *Anal  
659 Chem*. 2013 Dec 17;85(24):11725-31.
- 660 50. de Jager TL, Cockrell AE, Du Plessis SS. Ultraviolet Light Induced Generation of  
661 Reactive Oxygen Species. *Adv Exp Med Biol*. 2017;996:15-23.
- 662 51. Gruber J, Tang SY, Jenner AM, Mudway I, Blomberg A, Behndig A, et al. Allantoin in  
663 human plasma, serum, and nasal-lining fluids as a biomarker of oxidative stress: avoiding  
664 artifacts and establishing real in vivo concentrations. *Antioxid Redox Signal*. 2009  
665 Aug;11(8):1767-76.
- 666 52. Lee BC, Gladyshev VN. The biological significance of methionine sulfoxide  
667 stereochemistry. *Free Radic Biol Med*. 2011 Jan 15;50(2):221-7.
- 668 53. Maghzal GJ, Leck MC, Collinson E, Li C, Stocker R. Limited role for the bilirubin-  
669 biliverdin redox amplification cycle in the cellular antioxidant protection by biliverdin reductase. *J  
670 Biol Chem*. 2009 Oct 23;284(43):29251-9.
- 671 54. Chattopadhyay PK, Roederer M. Cytometry: today's technology and tomorrow's  
672 horizons. *Methods*. 2012 Jul;57(3):251-8.
- 673 55. Perfetto SP, Chattopadhyay PK, Roederer M. Seventeen-colour flow cytometry:  
674 unravelling the immune system. *Nat Rev Immunol*. 2004 Aug;4(8):648-55.
- 675 56. Roederer M, De Rosa S, Gerstein R, Anderson M, Bigos M, Stovel R, et al. 8 color, 10-  
676 parameter flow cytometry to elucidate complex leukocyte heterogeneity. *Cytometry*. 1997 Dec  
677 1;29(4):328-39.

- 678 57. Woodruff MC, Ramonell RP, Nguyen DC, Cashman KS, Saini AS, Haddad NS, et al.  
679 Extrafollicular B cell responses correlate with neutralizing antibodies and morbidity in COVID-  
680 19. *Nat Immunol.* 2020 Dec;21(12):1506-16.
- 681 58. Silvin A, Chapuis N, Dunsmore G, Goubet AG, Dubuisson A, Derosa L, et al. Elevated  
682 Calprotectin and Abnormal Myeloid Cell Subsets Discriminate Severe from Mild COVID-19. *Cell.*  
683 2020 Sep 17;182(6):1401-18.e18.
- 684 59. Wang J, Mauser A, Chao SF, Remington K, Treckmann R, Kaiser K, et al. Virus  
685 inactivation and protein recovery in a novel ultraviolet-C reactor. *Vox Sang.* 2004  
686 May;86(4):230-8.
- 687 60. Cutts TA, Cook BWM, Poliquin PG, Strong JE, Theriault SS. Correction for Cutts et al.,  
688 "Inactivating Zaire Ebolavirus in Whole-Blood Thin Smears Used for Malaria Diagnosis". *J Clin*  
689 *Microbiol.* 2021 May 19;59(6).
- 690 61. Mok CK, Goh VSL, Ma L, Chu JJH. Establish a standard inactivation protocol for virus  
691 research in a high containment laboratory. *International Journal of Infectious Diseases.*  
692 2020;101:254.
- 693  
694

695 **Figures**  
696

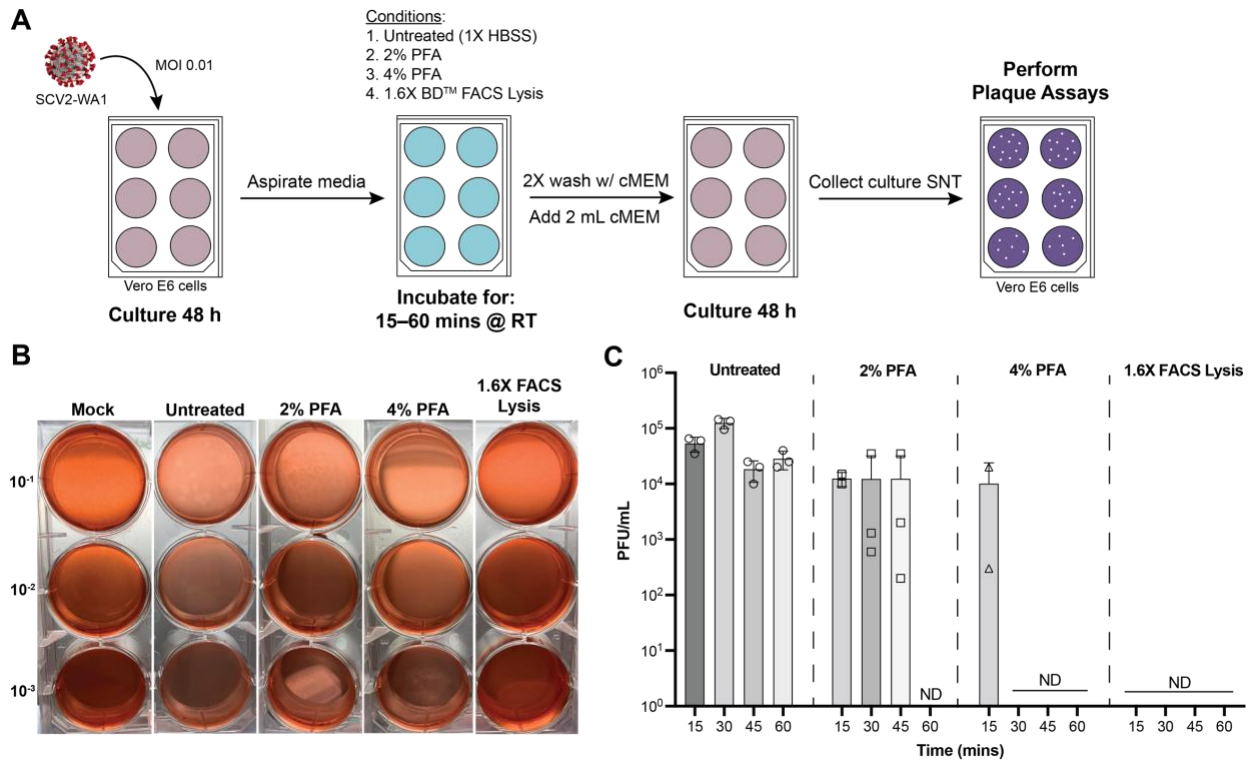

697  
698 **Figure 1. Fixation with commercially-available fixatives promote complete inactivation of**  
699 **SARS-CoV-2-infected cells amenable to flow cytometric analyses.**

- 700 A. Schematic of inactivation time course performed to evaluate inactivation efficiency. SNT  
701 = supernatant.  
702 B. Representative plaque assays from inactivation time course.  
703 C. Quantification of viral load for the 4 fixatives across the 4 time-points evaluated. ND = Not  
704 Detected (by plaque assay).

705  
706  
707

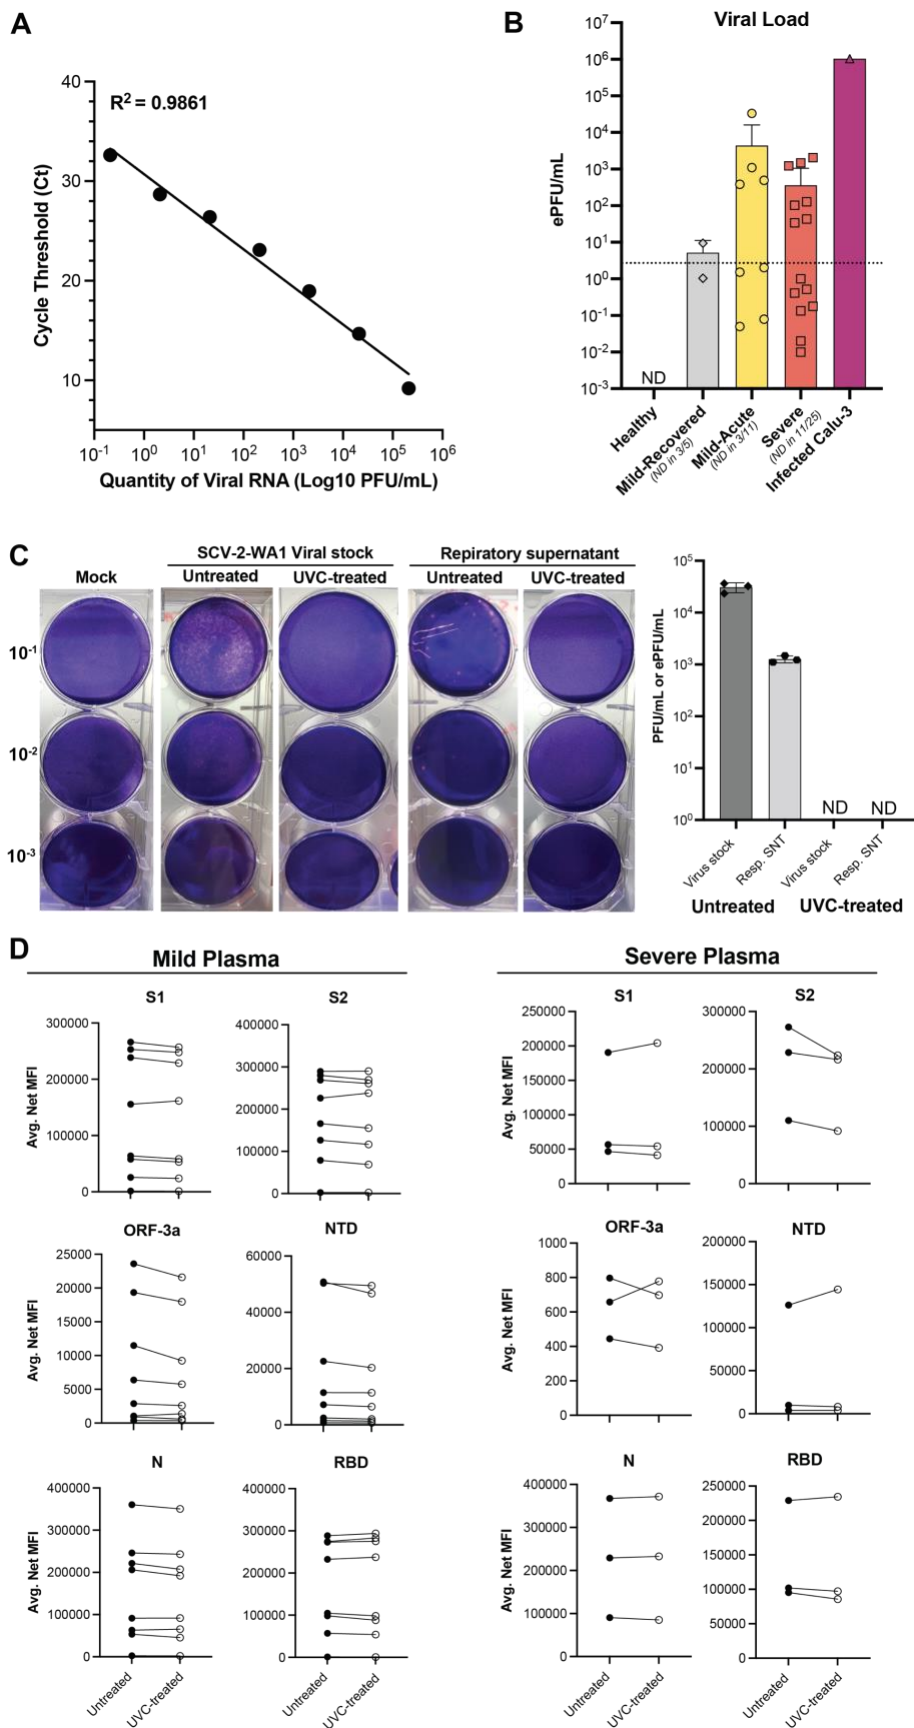

709 **Figure 2. UVC irradiation exposure for 30 minutes inactivates SARS-CoV-2 with minimal**  
710 **effects on antibody/protein detection assays.**

- 711 A. Viral curve generated from serially-diluted SCV2-WA1 stock of a known titer to extrapolate  
712 ePFU/mL from RT-qPCR data.
- 713 B. Viral load (ePFU/mL) in respiratory supernatant (Resp. SNT) from non-induced sputum  
714 (healthy and mild) and endotracheal aspirates (ETA; severe) samples using the viral curve  
715 generated in A. Dotted line = lower limit of quantification for the ePFU conversion  
716 determined by lowest dilution of stock virus ( $10^{-6}$ ) detected by RT-qPCR. ND = Not  
717 Detected (by RT-qPCR).
- 718 C. Representative plaque assays from stock SCV2-WA1 virus and respiratory supernatant  
719 (Resp. SNT) samples and quantification of viral load (PFU/mL for SCV2-WA1 stock and  
720 ePFU/mL for Resp. SNT from B) before and after UVC-treatment (30 min at  $\sim 4000$   
721  $\mu\text{watt}/\text{cm}^2$ ). ND = Not Detected (by plaque assay).
- 722 D. Comparison of SARS-CoV-2 antibody measurements in untreated and UVC-treated  
723 plasma samples from mild and severe COVID-19 patients.

724

725

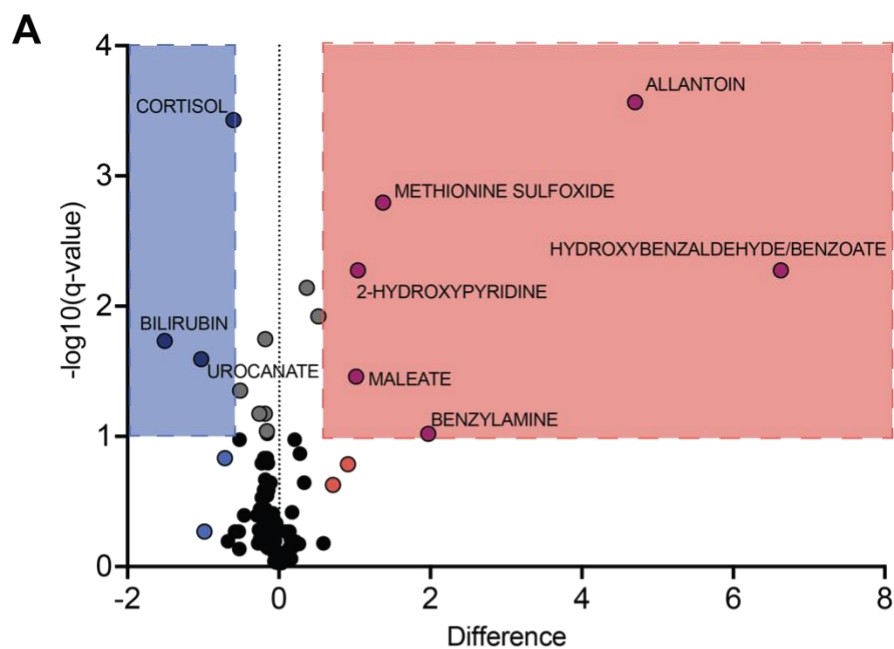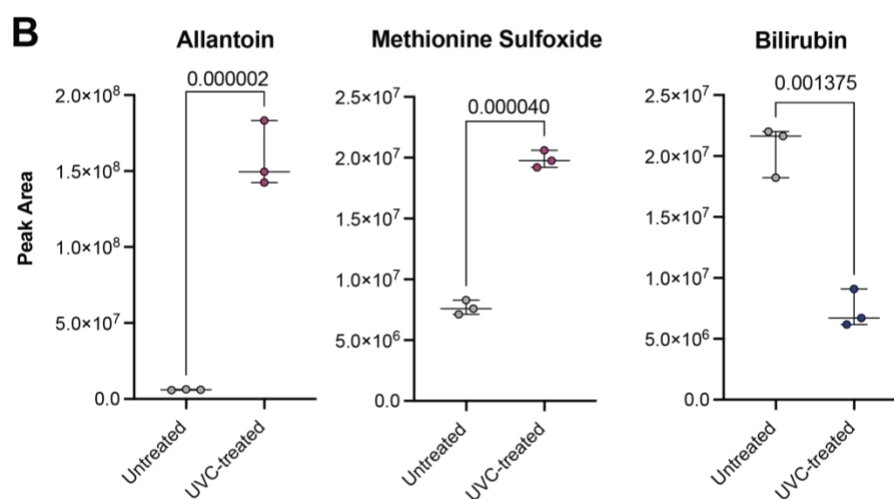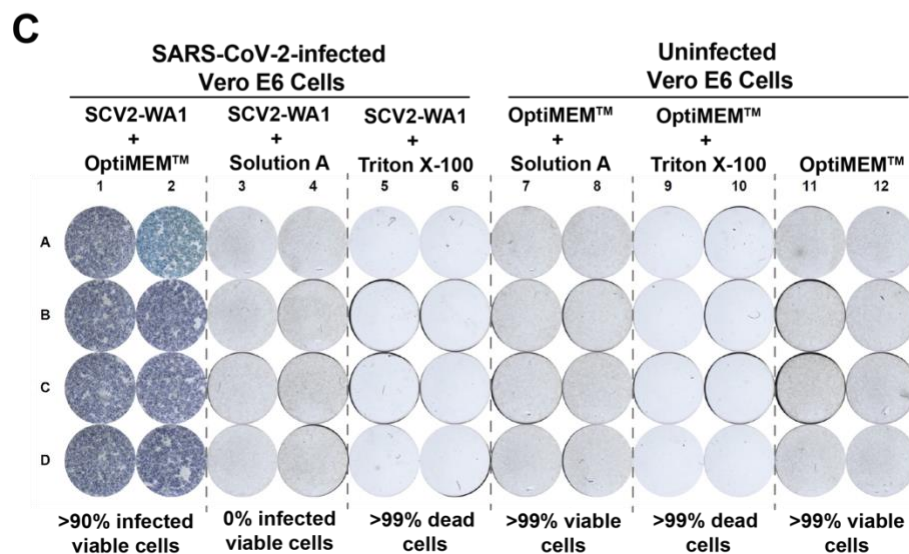

727 **Figure 3. Metabolite extraction solvent (Solution A) completely inactivates SARS-CoV-2**  
728 **and maintains sample quality for downstream metabolomics assays.**

- 729 A. Volcano plot (FDR <10%) displaying differentially-expressed metabolites in untreated  
730 versus UVC-treated NIST (standard) plasma samples.
- 731 B. Example plots of 3 representatives differentially-expressed, redox-active metabolites in  
732 untreated vs. UVC-treated NIST plasma samples.
- 733 C. FRNA results evaluating inactivation of the metabolite extraction solvent (Solution A) in  
734 the standard metabolomic sample processing procedure (see methods) and Triton X-100.  
735

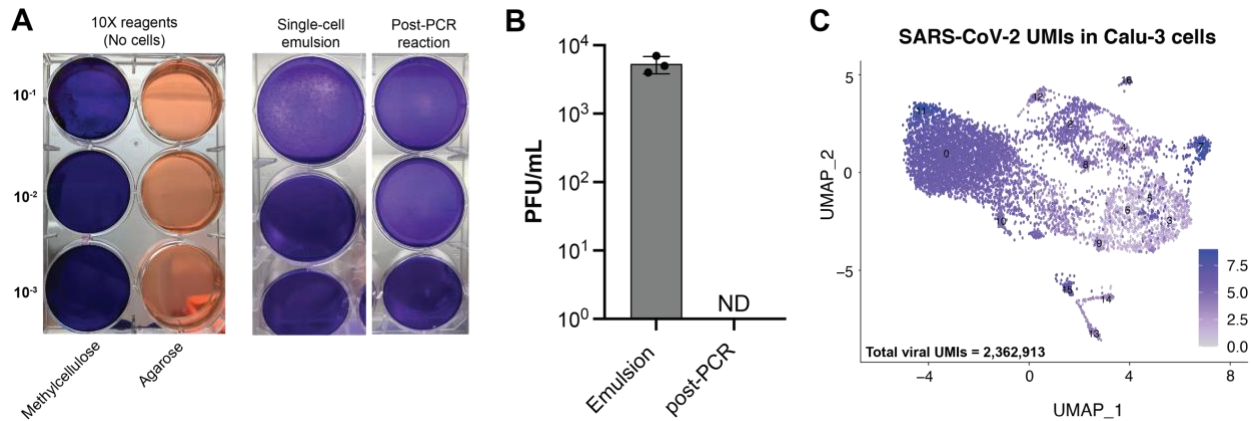

736  
737  
738  
739  
740  
741  
742  
743  
744  
745  
746  
747  
748  
749  
750

**Figure 4. Heat inactivation during cDNA synthesis completely inactivates SARS-CoV-2 in scRNA-seq emulsions.**

- Representative plaque assays performed using 10X Genomics' emulsion reagents alone (without cells) to evaluate reagent cytotoxicity on Vero E6 cells and single-cell emulsion with SCV2-WA1-infected Vero E6 cells (MOI 0.04), and the same emulsion after cDNA synthesis PCR reaction (45 min at 53°C followed by 5 min at 85°C).
- Quantification of viral load in single-cell emulsions of SCV2-WA1-infected Calu-3 cells (MOI 0.04) immediately after encapsulation and following PCR reaction for cDNA synthesis. N=3 independent samples. ND = Not Detected (by plaque assay).
- UMAP visualization of scRNA-seq data from SCV2-WA1-infected Calu-3 cells (MOI 0.04; N=8061 cells) showing expression of the 12 SARS-CoV-2 genes and total viral UMIs (inset).



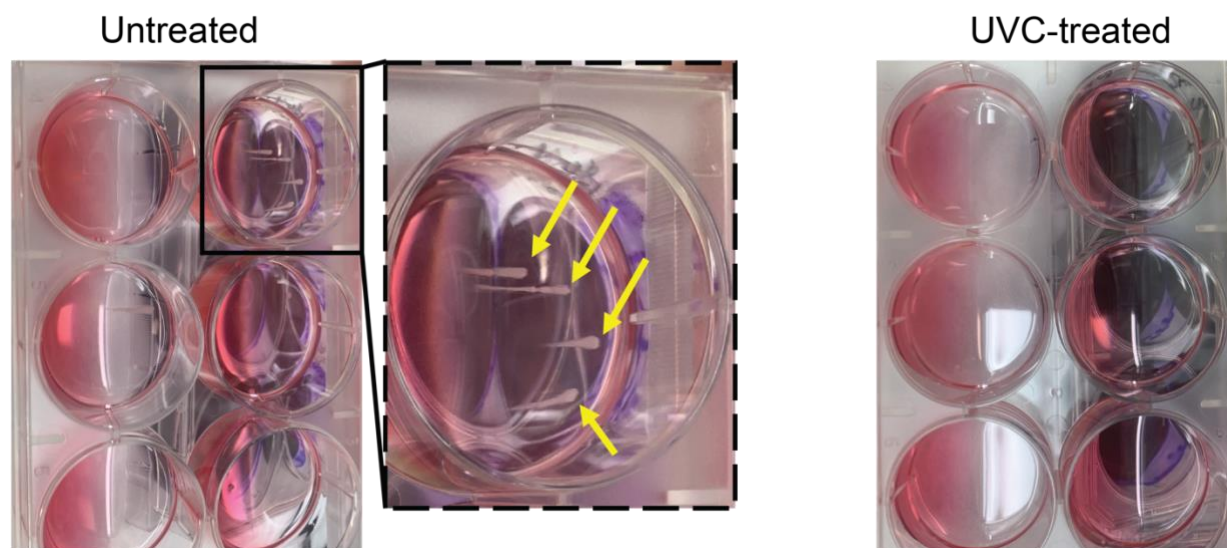

751  
752 **Figure S1. UVC inactivation abolishes microbial growth in plaque assay cultures.**  
753 Representative image of plaque assay cultures for respiratory supernatant samples (severe  
754 COVID-19 patients) before and after UVC-treatment (30 min at  $\sim 4000 \mu\text{watt}/\text{cm}^2$ ). Yellow arrows  
755 indicate microbial growth.
